# Supplementary material for: An improved SWAT vegetation growth module and its evaluation for four tropical ecosystems
Source: Copernicus journal article supplement (doi:10.5194/hess-21-4449-2017), 2017-09-07
Supplement: Supplementary file 1 [file hess-21-4449-2017-supplement.zip]

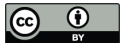

## *Supplement of*

# **An improved SWAT vegetation growth module and its evaluation for four tropical ecosystems**

**Tadesse Alemayehu et al.**

*Correspondence to:* Tadesse Alemayehu (t.abitew@un-ihe.org)

- hess-21-4449-2017-supplement-title-page.pdf
- SWAT-T
  - 000560000.sub
  - SWAT\_rev627\_smi\_tropics.exe
  - add\_SOS\_sub\_files.R
  - plant.dat
  - readme.txt
  - remove\_mgtop.R
  - subroutine\_modified
    - \* allocate\_parms.f
    - \* changeseason.f
    - \* etpot.f
    - \* getallo.f
    - \* grow.f
    - \* modparm.f
    - \* pmeas.f
    - \* readplant.f
    - \* readsub.f
    - \* readwgn.f
    - \* sim\_initday.f
    - \* sim\_inityr.f
    - \* simulate.f
    - \* swu.f
    - \* zero0.f
  - variables.txt
  - window size.txt

The copyright of individual parts of the supplement might differ from the CC BY 3.0 License.
